# Supplementary material for: Correcting for the influence of sampling conditions on biomarkers of exposure to phenols and phthalates: a 2-step standardization method based on regression residuals
Source: PubMed Central journal article supplement (PMC3533777; doi:10.1186/1476-069x-11-29), 2012-04-26
Supplement: 1476-069X-11-29-S2.pdf [file 1476-069X-11-29-S2.pdf]

**Correcting for the influence of sampling conditions on biomarkers of exposure to phenols and phthalates: a 2-step standardization method based on regression residuals.**

Marion Mortamais<sup>1,2</sup>, Cécile Chevrier<sup>3</sup>, Claire Philippiat<sup>1,4</sup>, Claire Petit<sup>3</sup>, Antonia M. Calafat<sup>5</sup>, Xiaoyun Ye<sup>5</sup>, Manori J. Silva<sup>5</sup>, Christian Brambilla<sup>6</sup>, Marinus J.C. Eijkemans<sup>7</sup>, Marie-Aline Charles<sup>8</sup>, Sylvaine Cordier<sup>3</sup>, Rémy Slama<sup>1,4\*</sup>.

<sup>1</sup>Team of Environmental Epidemiology applied to Reproduction and Respiratory Health, Inserm, Institut Albert Bonniot (U823), Grenoble, France

<sup>2</sup> Inserm, U1061, Montpellier, France

<sup>3</sup> Inserm, U625, Rennes, France

<sup>4</sup> Grenoble University, Institut Albert Bonniot (U823), Grenoble, France

<sup>5</sup> Centers for Disease Control and Prevention, Atlanta, GA, USA

<sup>6</sup> Inserm and Grenoble University, Institut Albert Bonniot (U823), Molecular Basis of lung cancer progression, Grenoble, France

<sup>7</sup> Julius Center for Health Sciences and Primary Care, UMC Utrecht, The Netherlands

<sup>8</sup> Inserm and INED joint research group, PARIS, and Inserm, U1018, CESP, Villejuif, France

**\*Corresponding author:**

Telephone: +33 476 54 94 02

Fax: +33 476 54 94 14

E-mail: [remy.slama@ujf-grenoble.fr](mailto:remy.slama@ujf-grenoble.fr)

|                                                                                                                                                                                                                                                                                                                                                                                                                          |    |
|--------------------------------------------------------------------------------------------------------------------------------------------------------------------------------------------------------------------------------------------------------------------------------------------------------------------------------------------------------------------------------------------------------------------------|----|
| <b>Table 1, Supplemental Material.</b> Limits of Detection of Urinary Phthalates Metabolites and Phenols and Detection Frequency Among French Pregnant Women from Eden and Pelagie Cohorts, 2002-2006.....                                                                                                                                                                                                               | 3  |
| <b>Table 2, Supplemental Material.</b> Correlation coefficients between Phthalates Monoesters Metabolites and Phenols Crude Urinary Concentrations Among French Pregnant Women from Eden and Pelagie Cohorts, 2002-2006. ....                                                                                                                                                                                            | 4  |
| <b>Table 3, Supplemental Material.</b> Adjusted Association Between Log-Transformed Phthalate Monoester Metabolites Urinary Concentrations and Characteristics of French Pregnant Women From Eden and Pélagie Cohorts, 2002-2006. Linear Regression Models Were Corrected for Over-Representation of Cases and Adjusted for Maternal age, BMI, Parity, Centre, Education, Occupation and Urine Sampling Conditions ..... | 5  |
| <b>Table 4, Supplemental Material.</b> Adjusted Association Between Log-Transformed Phenol Urinary Concentrations and Characteristics of French Pregnant Women from Eden and Pelagie Cohorts, 2002-2006. Linear Regression Models Were Corrected for Over-Representation of Cases and Adjusted for Maternal age, BMI, Parity, Centre, Education, Occupation and Urine Sampling Conditions.....                           | 7  |
| <b>Figure 1, Supplemental Material.</b> Median Values of Urinary Phthalate Metabolites ( $\mu\text{g/l}$ ) in Selected Publications Among Pregnant Women. ....                                                                                                                                                                                                                                                           | 9  |
| <b>Figure 2, Supplemental Material.</b> Median Values of Urinary Phenols ( $\mu\text{g/l}$ ) in Selected Publications Among Pregnant Women. ....                                                                                                                                                                                                                                                                         | 10 |

**Table 1, Supplemental Material.** Limits of Detection of Urinary Phthalates Metabolites and Phenols and Detection Frequency Among French Pregnant Women from Eden and Pélagie Cohorts, 2002-2006.

| Parent compound             | Metabolite | n   | LOD (µg/l) | Frequency of detection (%) |
|-----------------------------|------------|-----|------------|----------------------------|
| <b>Esters of phthalates</b> |            |     |            |                            |
| DEHP                        | MEHHP      | 287 | 0.7        | 100                        |
|                             | MEOHP      | 287 | 0.7        | 99.7                       |
|                             | MECPP      | 287 | 0.6        | 100                        |
|                             | MEHP       | 287 | 1.2        | 92                         |
|                             | MiBP       | 287 | 0.3        | 100                        |
| DiBP                        | MBP        | 287 | 0.6        | 100                        |
| DnBP                        | MCPP       | 287 | 0.2        | 98.6                       |
| DOP                         | MBzP       | 287 | 0.3        | 100                        |
| BzBP                        | MEP        | 287 | 0.8        | 100                        |
| DEP                         | MCNP       | 287 | 0.6        | 92.3                       |
| DiDP                        | MCOP       | 287 | 0.7        | 92.3                       |
| DiNP                        |            |     |            |                            |
| <b>Phenols</b>              |            |     |            |                            |
|                             | 2,4-DCP    | 191 | 0.2        | 96.3                       |
|                             | 2,5-DCP    | 191 | 0.2        | 99.5                       |
|                             | BP         | 191 | 0.2        | 80.1                       |
|                             | EP         | 191 | 1.0        | 68.1                       |
|                             | MP         | 191 | 1.0        | 100                        |
|                             | PP         | 191 | 0.2        | 96.9                       |
|                             | BP3        | 191 | 0.4        | 80.1                       |
|                             | BPA        | 191 | 0.4        | 99                         |
|                             | Triclosan  | 191 | 2.3        | 84.8                       |

The frequency of detection has been corrected by the over-sampling of cases due to the case-control design. Concentrations of monoethyl phthalate (MEP) and monobenzyl phthalate (MBzP) had been multiplied by 0.66 and 0.72, respectively, because the analytic standards used were of inadequate purity.

**Table 2, Supplemental Material.** Correlation coefficients between Phthalates Monoesters Metabolites and Phenols Log Transformed Crude Urinary Concentrations Among French Pregnant Women From Eden and Pélagie Cohorts, 2002-2006.

| Compound               | MEHHP+MEOHP+MECPP+MEHP | MiBP              | MBP                | MCPP              | MBzP              | MEP               | MCNP              | MCOP              | 2,4-DCP           | 2,5-DCP | Sum of Parabens   | BP3  | BPA   | TCS  |
|------------------------|------------------------|-------------------|--------------------|-------------------|-------------------|-------------------|-------------------|-------------------|-------------------|---------|-------------------|------|-------|------|
| MEHHP+MEOHP+MECPP+MEHP | 1.00                   |                   |                    |                   |                   |                   |                   |                   |                   |         |                   |      |       |      |
| MiBP                   | 0.56 <sup>1</sup>      | 1.00              |                    |                   |                   |                   |                   |                   |                   |         |                   |      |       |      |
| MBP                    | 0.52 <sup>1</sup>      | 0.49 <sup>1</sup> | 1.00               |                   |                   |                   |                   |                   |                   |         |                   |      |       |      |
| MCPP                   | 0.57 <sup>1</sup>      | 0.48 <sup>1</sup> | 0.76 <sup>1</sup>  | 1.00              |                   |                   |                   |                   |                   |         |                   |      |       |      |
| MBzP                   | 0.58 <sup>1</sup>      | 0.61 <sup>1</sup> | 0.49 <sup>1</sup>  | 0.47 <sup>1</sup> | 1.00              |                   |                   |                   |                   |         |                   |      |       |      |
| MEP                    | 0.31 <sup>1</sup>      | 0.26 <sup>1</sup> | 0.29 <sup>1</sup>  | 0.24 <sup>1</sup> | 0.28 <sup>1</sup> | 1.00              |                   |                   |                   |         |                   |      |       |      |
| MCNP                   | 0.42 <sup>1</sup>      | 0.40 <sup>1</sup> | 0.3 <sup>1</sup> 5 | 0.54 <sup>1</sup> | 0.40 <sup>1</sup> | 0.17 <sup>1</sup> | 1.00              |                   |                   |         |                   |      |       |      |
| MCOP                   | 0.50 <sup>1</sup>      | 0.43 <sup>1</sup> | 0.37 <sup>1</sup>  | 0.55 <sup>1</sup> | 0.45 <sup>1</sup> | 0.32 <sup>1</sup> | 0.58 <sup>1</sup> | 1.00              |                   |         |                   |      |       |      |
| 2,4-DCP                | 0.20 <sup>1</sup>      | 0.19 <sup>1</sup> | 0.14               | 0.08              | 0.12              | 0.21 <sup>1</sup> | 0.18 <sup>1</sup> | 0.24 <sup>1</sup> | 1.00              |         |                   |      |       |      |
| 2,5-DCP                | 0.16 <sup>1</sup>      | 0.22 <sup>1</sup> | 0.07               | 0.04              | 0.09              | 0.10              | 0.16 <sup>1</sup> | 0.19 <sup>1</sup> | 0.87 <sup>1</sup> | 1.00    |                   |      |       |      |
| Sum of Parabens        | -0.03                  | 0.08              | 0.06               | 0.08              | 0.01              | 0.24 <sup>1</sup> | 0.12              | 0.05              | 0.14              | 0.09    | 1.00              |      |       |      |
| BP3                    | 0.09                   | 0.13              | 0.06               | 0.03              | 0.12              | 0.24 <sup>1</sup> | 0.08              | 0.15 <sup>1</sup> | 0.10              | 0.13    | 0.28 <sup>1</sup> | 1.00 |       |      |
| BPA                    | 0.46 <sup>1</sup>      | 0.48 <sup>1</sup> | 0.41 <sup>1</sup>  | 0.50 <sup>1</sup> | 0.43 <sup>1</sup> | 0.28 <sup>1</sup> | 0.35 <sup>1</sup> | 0.44 <sup>1</sup> | 0.05              | -0.004  | 0.02              | 0.14 | 1.00  |      |
| Triclosan              | 0.12                   | -0.006            | 0.07               | 0.001             | 0.01              | 0.26 <sup>1</sup> | 0.04              | 0.08              | 0.39 <sup>1</sup> | 0.13    | 0.10              | 0.13 | -0.07 | 1.00 |

<sup>1</sup>p<0.05.

**Table 3, Supplemental Material.** Adjusted Association Between Log-Transformed Phthalate Monoester Metabolites Urinary Concentrations and Characteristics of French Pregnant Women From Eden and Pélagie Cohorts, 2002-2006. Linear Regression Models Were Corrected for Over-Representation of Cases and Adjusted for Maternal age, BMI, Parity, Centre, Education, Occupation and Urine Sampling Conditions.

| Characteristics of participants       | n   | MEHHP+MEOHP<br>+MECPP+MEHP |                   | MiBP    |                    | MBP     |                    | MCP     |                   | MBzP    |                    | MEP     |                   | MCNP    |                   | MCOP    |                    |
|---------------------------------------|-----|----------------------------|-------------------|---------|--------------------|---------|--------------------|---------|-------------------|---------|--------------------|---------|-------------------|---------|-------------------|---------|--------------------|
|                                       |     | $\beta$                    | P                 | $\beta$ | P                  | $\beta$ | P                  | $\beta$ | P                 | $\beta$ | P                  | $\beta$ | P                 | $\beta$ | P                 | $\beta$ | P                  |
| Date of sampling                      | 287 |                            | 0.52 <sup>g</sup> |         | <0.01 <sup>g</sup> |         | <0.01 <sup>g</sup> |         | 0.14 <sup>g</sup> |         | 0.32 <sup>g</sup>  |         | 0.73 <sup>g</sup> |         | 0.08 <sup>g</sup> |         | <0.01 <sup>g</sup> |
| < 1 Jan 2004                          | 72  | 0                          |                   | 0       |                    | 0       |                    | 0       |                   | 0       |                    | 0       |                   | 0       |                   | 0       |                    |
| 1 Jan 2004 to 27 May 2004             | 69  | -0.01                      | 0.94              | 0.03    | 0.89               | 0.01    | 0.95               | -0.02   | 0.91              | -0.03   | 0.90               | 0.17    | 0.43              | 0.006   | 0.98              | 0.17    | 0.35               |
| 28 May 2004 to 23 Feb 2005            | 73  | 0.03                       | 0.93              | 0.20    | 0.27               | -0.16   | 0.45               | -0.22   | 0.27              | -0.13   | 0.60               | -0.06   | 0.73              | 0.12    | 0.52              | 0.35    | 0.05               |
| ≥ 24 Feb 2005                         | 73  | -0.21                      | 0.33              | 0.10    | 0.66               | -0.65   | <0.01              | -0.45   | 0.06              | -0.42   | 0.11               | -0.02   | 0.92              | -0.32   | 0.12              | 0.73    | <0.01              |
| P trend                               |     |                            | 0.54              |         | 0.45               |         | <0.01              |         | 0.04              |         | 0.13               |         | 0.68              |         | 0.29              |         | <0.01              |
| Continuous <sup>a</sup>               |     | -0.12                      | 0.19              | 0.04    | 0.68               | -0.24   | 0.02               | -0.19   | 0.04              | -0.18   | 0.09               | -0.02   | 0.84              | -0.10   | 0.25              | 0.31    | <0.01              |
| Maternal age (years)                  | 287 |                            | 0.28 <sup>g</sup> |         | 0.24 <sup>g</sup>  |         | 0.01 <sup>g</sup>  |         | 0.07 <sup>g</sup> |         | 0.05 <sup>g</sup>  |         | 0.40 <sup>g</sup> |         | 0.32 <sup>g</sup> |         | 0.17 <sup>g</sup>  |
| < 25                                  | 44  | 0                          |                   | 0       |                    | 0       |                    | 0       |                   | 0       |                    | 0       |                   | 0       |                   | 0       |                    |
| ≥ 25 to 29                            | 113 | -0.28                      | 0.17              | -0.01   | 0.96               | 0.76    | <0.01              | 0.27    | 0.23              | 0.43    | 0.08               | 0.32    | 0.12              | -0.13   | 0.57              | 0.06    | 0.74               |
| ≥ 30 to 34                            | 88  | -0.37                      | 0.06              | -0.25   | 0.24               | 0.40    | 0.08               | -0.12   | 0.61              | 0.0009  | 0.99               | 0.37    | 0.12              | -0.26   | 0.29              | -0.24   | 0.24               |
| > 35                                  | 42  | -0.41                      | 0.12              | -0.36   | 0.15               | 0.28    | 0.29               | -0.02   | 0.94              | 0.01    | 0.96               | 0.35    | 0.24              | -0.40   | 0.12              | -0.30   | 0.26               |
| P trend                               |     |                            | 0.13              |         | 0.05               |         | 0.54               |         | 0.19              |         | 0.22               |         | 0.36              |         | 0.07              |         | 0.05               |
| Continuous <sup>a</sup>               |     | -0.01                      | 0.42              | -0.03   | 0.02               | -0.01   | 0.51               | -0.01   | 0.43              | -0.03   | 0.14               | 0.01    | 0.54              | -0.02   | 0.19              | -0.02   | 0.31               |
| BMI <sup>b</sup> (kg/m <sup>2</sup> ) | 287 |                            | 0.08 <sup>g</sup> |         | 0.11 <sup>g</sup>  |         | 0.03 <sup>g</sup>  |         | 0.42 <sup>g</sup> |         | 0.55 <sup>g</sup>  |         | 0.50 <sup>g</sup> |         | 0.71 <sup>g</sup> |         | 0.72 <sup>g</sup>  |
| < 18.5                                | 29  | 0                          |                   | 0       |                    | 0       |                    | 0       |                   | 0       |                    | 0       |                   | 0       |                   | 0       |                    |
| ≥ 18.5 to 24.99                       | 185 | -0.30                      | 0.16              | -0.19   | 0.33               | -0.65   | 0.01               | -0.33   | 0.15              | 0.08    | 0.73               | -0.36   | 0.13              | 0.03    | 0.89              | -0.11   | 0.63               |
| ≥ 25 to 29.99                         | 47  | -0.50                      | 0.02              | -0.34   | 0.09               | -0.76   | <0.01              | -0.40   | 0.12              | -0.07   | 0.79               | -0.30   | 0.30              | 0.07    | 0.78              | 0.07    | 0.79               |
| > 30                                  | 26  | -0.21                      | 0.44              | 0.28    | 0.39               | -0.64   | 0.05               | -0.40   | 0.14              | 0.40    | 0.25               | -0.27   | 0.39              | 0.36    | 0.28              | 0.06    | 0.85               |
| P trend                               |     |                            | 0.17              |         | 0.77               |         | 0.05               |         | 0.16              |         | 0.62               |         | 0.64              |         | 0.36              |         | 0.42               |
| Continuous <sup>c</sup>               |     | -0.02                      | 0.49              | 0.0005  | 0.99               | -0.02   | 0.60               | 0.02    | 0.44              | 0.05    | 0.22               | -0.03   | 0.48              | -0.0002 | 0.99              | 0.04    | 0.20               |
| Parity (previous livebirths)          | 287 |                            | 0.27 <sup>g</sup> |         | 0.48 <sup>g</sup>  |         | 0.54 <sup>g</sup>  |         | 0.53 <sup>g</sup> |         | 0.36 <sup>g</sup>  |         | 0.06 <sup>g</sup> |         | 0.09 <sup>g</sup> |         | 0.26 <sup>g</sup>  |
| 0                                     | 115 | 0                          |                   | 0       |                    | 0       |                    | 0       |                   | 0       |                    | 0       |                   | 0       |                   | 0       |                    |
| 1                                     | 114 | 0.28                       | 0.11              | 0.05    | 0.74               | 0.03    | 0.86               | 0.15    | 0.27              | 0.21    | 0.20               | -0.40   | 0.02              | -0.03   | 0.84              | 0.14    | 0.32               |
| ≥ 2                                   | 58  | 0.13                       | 0.54              | 0.22    | 0.23               | 0.21    | 0.29               | 0.12    | 0.52              | 0.24    | 0.30               | -0.10   | 0.68              | 0.42    | 0.06              | 0.35    | 0.11               |
| P trend                               |     |                            | 0.26              |         | 0.30               |         | 0.40               |         | 0.34              |         | 0.19               |         | 0.24              |         | 0.18              |         | 0.10               |
| Continuous <sup>d</sup>               |     | 0.10                       | 0.27              | 0.09    | 0.21               | 0.08    | 0.31               | 0.06    | 0.39              | 0.11    | 0.23               | -0.06   | 0.63              | 0.16    | 0.07              | 0.15    | 0.08               |
| Centre                                | 287 |                            | 0.86 <sup>g</sup> |         | 0.42 <sup>g</sup>  |         | 0.23 <sup>g</sup>  |         | 0.36 <sup>g</sup> |         | 0.87 <sup>g</sup>  |         | 0.94 <sup>g</sup> |         | 0.77 <sup>g</sup> |         | 0.66 <sup>g</sup>  |
| Poitiers                              | 91  | 0                          |                   | 0       |                    | 0       |                    | 0       |                   | 0       |                    | 0       |                   | 0       |                   | 0       |                    |
| Nancy                                 | 100 | -0.11                      | 0.58              | 0.21    | 0.27               | 0.26    | 0.18               | -0.02   | 0.92              | -0.11   | 0.61               | 0.03    | 0.92              | 0.13    | 0.52              | -0.16   | 0.37               |
| Pélagie                               | 96  | -0.26                      | 0.87              | -0.88   | 0.58               | 2.8     | 0.13               | 2.1     | 0.18              | -0.49   | 0.80               | 0.72    | 0.72              | 0.69    | 0.71              | 0.02    | 0.99               |
| Maternal education                    | 287 |                            | 0.45 <sup>g</sup> |         | 0.02 <sup>g</sup>  |         | 0.59 <sup>g</sup>  |         | 0.57 <sup>g</sup> |         | <0.01 <sup>g</sup> |         | 0.91 <sup>g</sup> |         | 0.98 <sup>g</sup> |         | 0.05 <sup>g</sup>  |
| Primary education                     | 5   | -0.16                      | 0.61              | 0.19    | 0.58               | 0.50    | 0.12               | 0.33    | 0.32              | 0.10    | 0.79               | 0.12    | 0.86              | -0.05   | 0.87              | -0.32   | 0.28               |
| < High school                         | 75  | 0                          |                   | 0       |                    | 0       |                    | 0       |                   | 0       |                    | 0       |                   | 0       |                   | 0       |                    |

|                         |     |        |                   |       |                   |        |                   |       |                   |       |                   |       |                   |       |                   |        |                   |
|-------------------------|-----|--------|-------------------|-------|-------------------|--------|-------------------|-------|-------------------|-------|-------------------|-------|-------------------|-------|-------------------|--------|-------------------|
| High school             | 56  | -0.30  | 0.09              | -0.38 | 0.04              | 0.03   | 0.90              | -0.18 | 0.29              | -0.51 | 0.03              | -0.18 | 0.37              | -0.09 | 0.64              | -0.31  | 0.11              |
| High school + 2 years   | 62  | -0.003 | 0.99              | -0.57 | <0.01             | 0.07   | 0.73              | -0.17 | 0.38              | -0.75 | <0.01             | -0.08 | 0.74              | -0.13 | 0.57              | -0.53  | <0.01             |
| ≥ High school + 3 years | 89  | 0.001  | 0.99              | -0.18 | 0.29              | -0.001 | 0.99              | -0.05 | 0.75              | -0.40 | 0.04              | -0.15 | 0.51              | -0.11 | 0.54              | -0.36  | 0.05              |
| Occupation <sup>e</sup> | 287 |        |                   |       |                   |        |                   |       |                   |       |                   |       |                   |       |                   |        |                   |
| No                      | 70  | 0      |                   | 0     |                   | 0      |                   | 0     |                   | 0     |                   | 0     |                   | 0     |                   | 0      |                   |
| Yes                     | 217 | 0.12   | 0.49              | 0.22  | 0.30              | -0.29  | 0.14              | -0.13 | 0.44              | 0.06  | 0.76              | -0.03 | 0.90              | 0.35  | 0.07              | 0.23   | 0.18              |
| Active smoking          | 287 |        | 0.34 <sup>g</sup> |       | 0.59 <sup>g</sup> |        | 0.76 <sup>g</sup> |       | 0.07 <sup>g</sup> |       | 0.87 <sup>g</sup> |       | 0.13 <sup>g</sup> |       | 0.22 <sup>g</sup> |        | 0.92 <sup>g</sup> |
| 0                       | 240 | 0      |                   | 0     |                   | 0      |                   | 0     |                   | 0     |                   | 0     |                   | 0     |                   | 0      |                   |
| 1-5 cigarettes/day      | 30  | 0.03   | 0.92              | -0.18 | 0.33              | 0.03   | 0.92              | -0.16 | 0.47              | -0.10 | 0.66              | 0.11  | 0.58              | 0.30  | 0.29              | -0.12  | 0.53              |
| 6-10 cigarettes/day     | 12  | -0.13  | 0.60              | -0.13 | 0.70              | 0.02   | 0.95              | 0.32  | 0.08              | -0.10 | 0.82              | -0.29 | 0.15              | 1.3   | 0.08              | 6e-07  | 1.0               |
| ≥ 10 cigarettes/day     | 5   | 0.71   | 0.08              | 0.23  | 0.42              | 0.45   | 0.28              | 0.50  | 0.07              | 0.29  | 0.50              | 1.4   | 0.08              | -0.13 | 0.72              | -0.10  | 0.73              |
| <i>P</i> trend          |     |        | 0.73              |       | 0.54              |        | 0.67              |       | 0.55              |       | 0.82              |       | 0.43              |       | 0.07              |        | 0.60              |
| Continuous <sup>f</sup> |     | 0.01   | 0.70              | -0.01 | 0.63              | 0.02   | 0.51              | 0.01  | 0.71              | 0.002 | 0.95              | 0.03  | 0.30              | 0.07  | 0.11              | -0.005 | 0.83              |

<sup>a</sup> Regression parameters given for an increase by 1 year.

<sup>b</sup> Before pregnancy.

<sup>c</sup> Regression parameters are given for an increase by 1 kg/ m<sup>2</sup> in body mass index.

<sup>d</sup> Regression parameters are given for each additional child.

<sup>e</sup> Occupation at time of collection of urine sample (yes/no).

<sup>f</sup> Regression parameters are given for an increase by one cigarette/day.

<sup>g</sup> *P* of heterogeneity test.

**Table 4, Supplemental Material.** Adjusted Association Between Log-Transformed Phenol Urinary Concentrations and Characteristics of French Pregnant Women From Eden Cohort, 2002-2006. Linear Regression Models Were Corrected for Over-Representation of Cases and Adjusted for Maternal Age, BMI, Parity, Centre, Education, Occupation at the Time of Urine Collection and Urine Sampling Conditions.

| Characteristics of participants       | n   | 2,4-DCP |                   | 2,5-DCP |                   | Sum of Parabens |                   | BP3     |                   | BPA     |                    | TCS     |                   |
|---------------------------------------|-----|---------|-------------------|---------|-------------------|-----------------|-------------------|---------|-------------------|---------|--------------------|---------|-------------------|
|                                       |     | $\beta$ | <i>P</i>          | $\beta$ | <i>P</i>          | $\beta$         | <i>P</i>          | $\beta$ | <i>P</i>          | $\beta$ | <i>P</i>           | $\beta$ | <i>P</i>          |
| Date of sampling                      | 191 |         | 0.07 <sup>g</sup> |         | 0.04 <sup>g</sup> |                 | 0.62 <sup>g</sup> |         | 0.19 <sup>g</sup> |         | 0.22 <sup>g</sup>  |         | 0.26 <sup>g</sup> |
| < 1 Jan 2004                          | 19  | 0       |                   | 0       |                   | 0               |                   | 0       |                   | 0       |                    | 0       |                   |
| 1 Jan 2004 to 27 May 2004             | 45  | -0.04   | 0.91              | -0.12   | 0.81              | 0.68            | 0.19              | 1.1     | 0.08              | 0.27    | 0.36               | -0.18   | 0.80              |
| 28 May 2004 to 23 Feb 2005            | 60  | 0.64    | 0.07              | 0.95    | 0.05              | 0.37            | 0.39              | 0.67    | 0.14              | -0.04   | 0.88               | 0.37    | 0.59              |
| ≥ 24 Feb 2005                         | 67  | 0.06    | 0.85              | 0.05    | 0.91              | 0.37            | 0.41              | 1.2     | 0.03              | 0.30    | 0.32               | -0.54   | 0.41              |
| <i>P</i> trend                        |     |         | 0.57              |         | 0.57              |                 | 0.95              |         | 0.19              |         | 0.52               |         | 0.42              |
| Continuous <sup>a</sup>               |     | 0.08    | 0.60              | 0.19    | 0.39              | -0.02           | 0.93              | 0.35    | 0.11              | 0.08    | 0.44               | -0.29   | 0.32              |
| Maternal age (years)                  | 191 |         | 0.37 <sup>g</sup> |         | 0.70 <sup>g</sup> |                 | 0.31 <sup>g</sup> |         | 0.02 <sup>g</sup> |         | 0.03 <sup>g</sup>  |         | 0.12 <sup>g</sup> |
| < 25                                  | 35  | 0       |                   | 0       |                   | 0               |                   | 0       |                   | 0       |                    | 0       |                   |
| ≥ 25 to 29                            | 71  | 0.34    | 0.23              | 0.28    | 0.52              | -0.15           | 0.71              | -0.85   | 0.08              | -0.19   | 0.30               | 0.76    | 0.16              |
| ≥ 30 to 34                            | 57  | 0.59    | 0.10              | 0.63    | 0.28              | 0.16            | 0.71              | -0.29   | 0.62              | -0.54   | <0.01              | 1.3     | 0.02              |
| > 35                                  | 28  | 0.25    | 0.46              | 0.24    | 0.64              | 0.69            | 0.22              | 0.59    | 0.44              | -0.33   | 0.23               | 0.78    | 0.24              |
| <i>P</i> trend                        |     |         | 0.39              |         | 0.48              |                 | 0.13              |         | 0.19              |         | 0.07               |         | 0.16              |
| Continuous <sup>a</sup>               |     | 0.02    | 0.37              | 0.03    | 0.39              | 0.03            | 0.36              | 0.08    | 0.12              | -0.01   | 0.46               | 0.04    | 0.32              |
| BMI <sup>b</sup> (kg/m <sup>2</sup> ) | 191 |         | 0.22 <sup>g</sup> |         | 0.91 <sup>g</sup> |                 | 0.43 <sup>g</sup> |         | 0.09 <sup>g</sup> |         | 0.57 <sup>g</sup>  |         | 0.17 <sup>g</sup> |
| < 18.5                                | 19  | 0       |                   | 0       |                   | 0               |                   | 0       |                   | 0       |                    | 0       |                   |
| ≥ 18.5 to 24.99                       | 118 | -0.40   | 0.22              | -0.25   | 0.59              | 0.23            | 0.59              | 0.65    | 0.04              | -0.11   | 0.49               | -0.42   | 0.47              |
| ≥ 25 to 29.99                         | 34  | -0.05   | 0.89              | -0.04   | 0.93              | -0.45           | 0.40              | 0.92    | 0.05              | -0.23   | 0.28               | 0.61    | 0.34              |
| > 30                                  | 20  | -0.03   | 0.95              | -0.14   | 0.82              | 0.21            | 0.71              | 0.95    | 0.11              | -0.26   | 0.23               | -0.39   | 0.62              |
| <i>P</i> trend                        |     |         | 0.45              |         | 0.95              |                 | 0.54              |         | 0.15              |         | 0.27               |         | 0.56              |
| Continuous <sup>c</sup>               |     | -0.10   | 0.03              | -0.06   | 0.32              | 0.11            | 0.11              | -0.03   | 0.74              | -0.002  | 0.93               | -0.12   | 0.17              |
| Parity (previous livebirths)          | 191 |         | 0.89 <sup>g</sup> |         | 0.95 <sup>g</sup> |                 | 0.02 <sup>g</sup> |         | 0.02 <sup>g</sup> |         | <0.01 <sup>g</sup> |         | 0.37 <sup>g</sup> |
| 0                                     | 72  | 0       |                   | 0       |                   | 0               |                   | 0       |                   | 0       |                    | 0       |                   |
| 1                                     | 75  | 0.12    | 0.64              | 0.08    | 0.83              | -0.83           | 0.02              | -0.92   | 0.01              | 0.20    | 0.19               | -0.40   | 0.34              |
| ≥ 2                                   | 44  | 0.06    | 0.84              | 0.13    | 0.75              | -0.97           | 0.01              | -0.87   | 0.04              | 0.58    | <0.01              | -0.74   | 0.17              |
| <i>P</i> trend                        |     |         | 0.78              |         | 0.74              |                 | <0.01             |         | 0.02              |         | <0.01              |         | 0.16              |
| Continuous <sup>d</sup>               |     | -0.06   | 0.56              | -0.004  | 0.98              | -0.33           | 0.05              | -0.18   | 0.27              | 0.18    | <0.01              | -0.46   | 0.01              |
| Centre                                | 191 |         |                   |         |                   |                 |                   |         |                   |         |                    |         |                   |
| Poitiers                              | 91  | 0       |                   | 0       |                   | 0               |                   | 0       |                   | 0       |                    | 0       |                   |
| Nancy                                 | 100 | 0.49    | 0.08              | 0.65    | 0.11              | 0.12            | 0.73              | -0.12   | 0.78              | -0.39   | <0.01              | 0.08    | 0.86              |
| Maternal education                    | 191 |         | 0.25 <sup>g</sup> |         | 0.31 <sup>g</sup> |                 | 0.08 <sup>g</sup> |         | 0.57 <sup>g</sup> |         | 0.32 <sup>g</sup>  |         | 0.29 <sup>g</sup> |
| Primary education                     | 5   | -0.52   | 0.23              | -0.72   | 0.28              | 1.2             | 0.03              | 1.0     | 0.37              | -0.55   | 0.12               | -1.5    | 0.05              |

|                         |     |       |                   |       |                   |        |                   |       |                   |       |                   |        |                    |
|-------------------------|-----|-------|-------------------|-------|-------------------|--------|-------------------|-------|-------------------|-------|-------------------|--------|--------------------|
| < High school           | 56  | 0     |                   | 0     |                   | 0      |                   | 0     |                   | 0     |                   | 0      |                    |
| High school             | 37  | -0.43 | 0.11              | -0.64 | 0.10              | 0.14   | 0.72              | -0.37 | 0.34              | -0.06 | 0.75              | -0.003 | 0.99               |
| High school + 2 years   | 39  | -0.53 | 0.07              | -0.72 | 0.12              | 0.63   | 0.12              | 0.37  | 0.55              | 0.20  | 0.24              | -0.009 | 0.99               |
| ≥ High school + 3 years | 54  | -0.24 | 0.37              | -0.31 | 0.45              | 0.95   | 0.04              | 0.25  | 0.62              | -0.02 | 0.92              | 0.25   | 0.61               |
| Occupation <sup>e</sup> | 191 |       |                   |       |                   |        |                   |       |                   |       |                   |        |                    |
| No                      | 58  | 0     |                   | 0     |                   | 0      |                   | 0     |                   | 0     |                   | 0      |                    |
| Yes                     | 133 | 0.09  | 0.67              | -0.03 | 0.91              | -0.004 | 0.99              | 0.09  | 0.80              | -0.11 | 0.56              | -0.12  | 0.76               |
| Active smoking          | 191 |       | 0.43 <sup>§</sup> |       | 0.85 <sup>§</sup> |        | 0.60 <sup>§</sup> |       | 0.03 <sup>§</sup> |       | 0.06 <sup>§</sup> |        | <0.01 <sup>§</sup> |
| 0                       | 158 | 0     |                   | 0     |                   | 0      |                   | 0     |                   | 0     |                   | 0      |                    |
| 1-5 cigarettes/day      | 20  | 0.10  | 0.72              | 0.04  | 0.93              | -0.31  | 0.56              | -0.94 | 0.05              | -0.06 | 0.80              | -0.33  | 0.56               |
| 6-10 cigarettes/day     | 8   | -0.25 | 0.63              | 0.26  | 0.76              | -0.52  | 0.32              | 0.30  | 0.54              | -0.03 | 0.87              | -0.67  | 0.45               |
| ≥ 10 cigarettes/day     | 5   | 0.58  | 0.12              | -0.66 | 0.43              | 0.70   | 0.66              | -1.5  | 0.08              | 0.53  | 0.02              | 3.5    | <0.01              |
| <i>P</i> trend          |     |       | 0.66              |       | 0.87              |        | 0.79              |       | 0.05              |       | 0.57              |        | 0.40               |
| Continuous <sup>f</sup> |     | 0.02  | 0.56              | -0.02 | 0.68              | -0.005 | 0.93              | -0.10 | 0.02              | 0.02  | 0.33              | 0.08   | 0.24               |

<sup>a</sup> Regression parameters given for an increase by 1 year.

<sup>b</sup> Before pregnancy.

<sup>c</sup> Regression parameters are given for an increase by 1 kg/ m<sup>2</sup> in body mass index.

<sup>d</sup> Regression parameters are given for each additional child.

<sup>e</sup> Occupation at time collection of urine sample (yes/no).

<sup>f</sup> Regression parameters are given for an increase by one cigarette/day.

<sup>§</sup> *P*-value of heterogeneity test



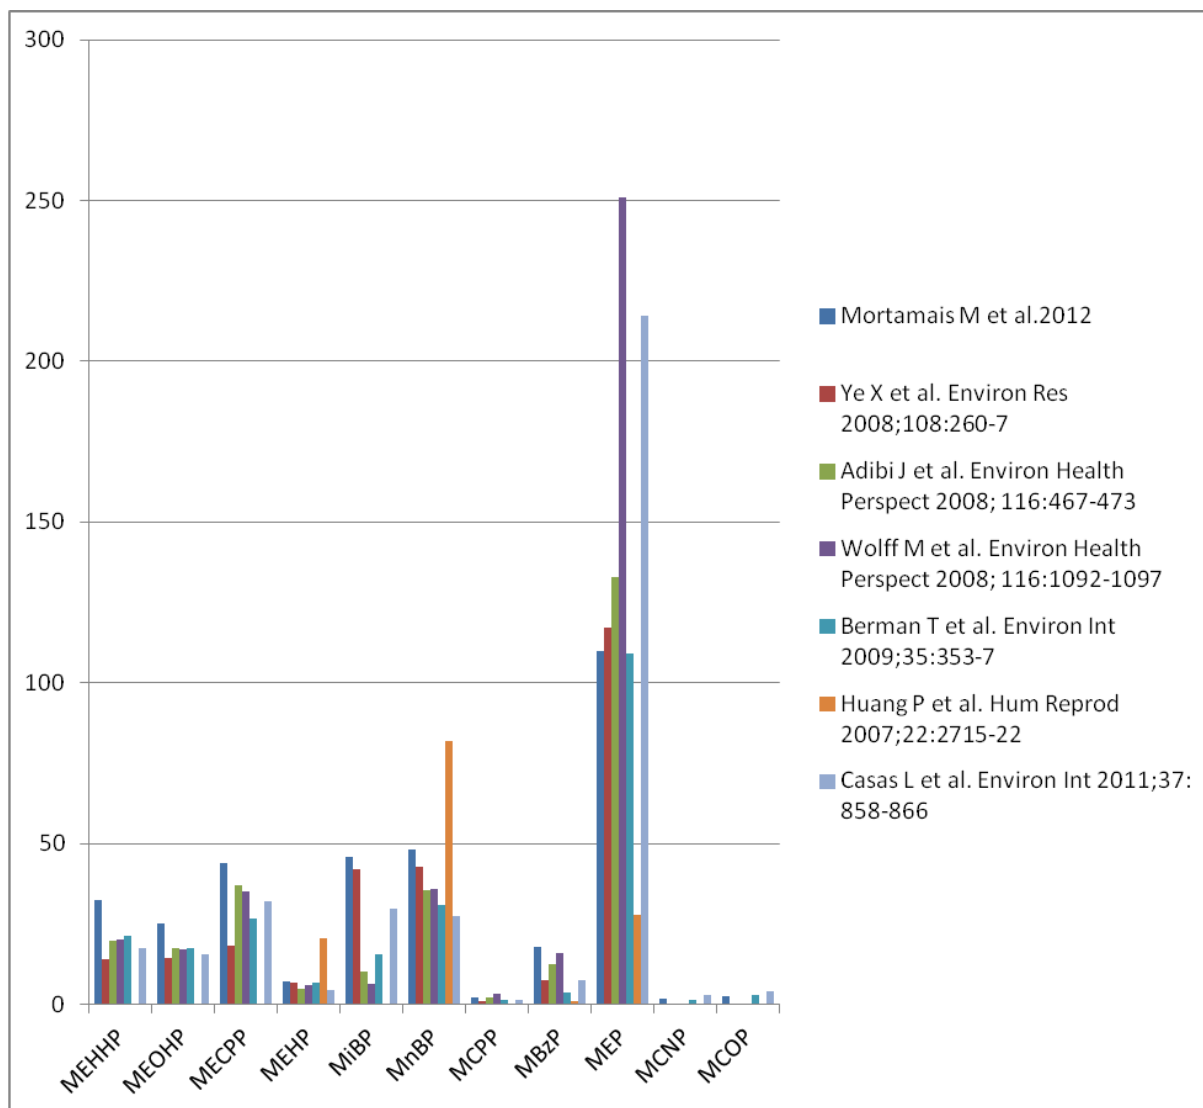

**Figure 1, Supplemental Material.** Median Values of Urinary Phthalate Metabolites ( $\mu\text{g/l}$ ) in Selected Publications Among Pregnant Women.

**Remark:** The concentrations of monoethyl phthalate (MEP) and monobenzyl phthalate (MBzP) have been corrected for some studies; correction factors are 0.66 (MEP) and 0.72 (MBzP) (A. Calafat, personal communication). These correction factors have been applied to all of the studies that had their analyses done at CDC (Mortamais et al. 2012, Adibi et al. 2008, Wolff et al. 2008, Berman et al. 2009, and Casas et al. 2011).

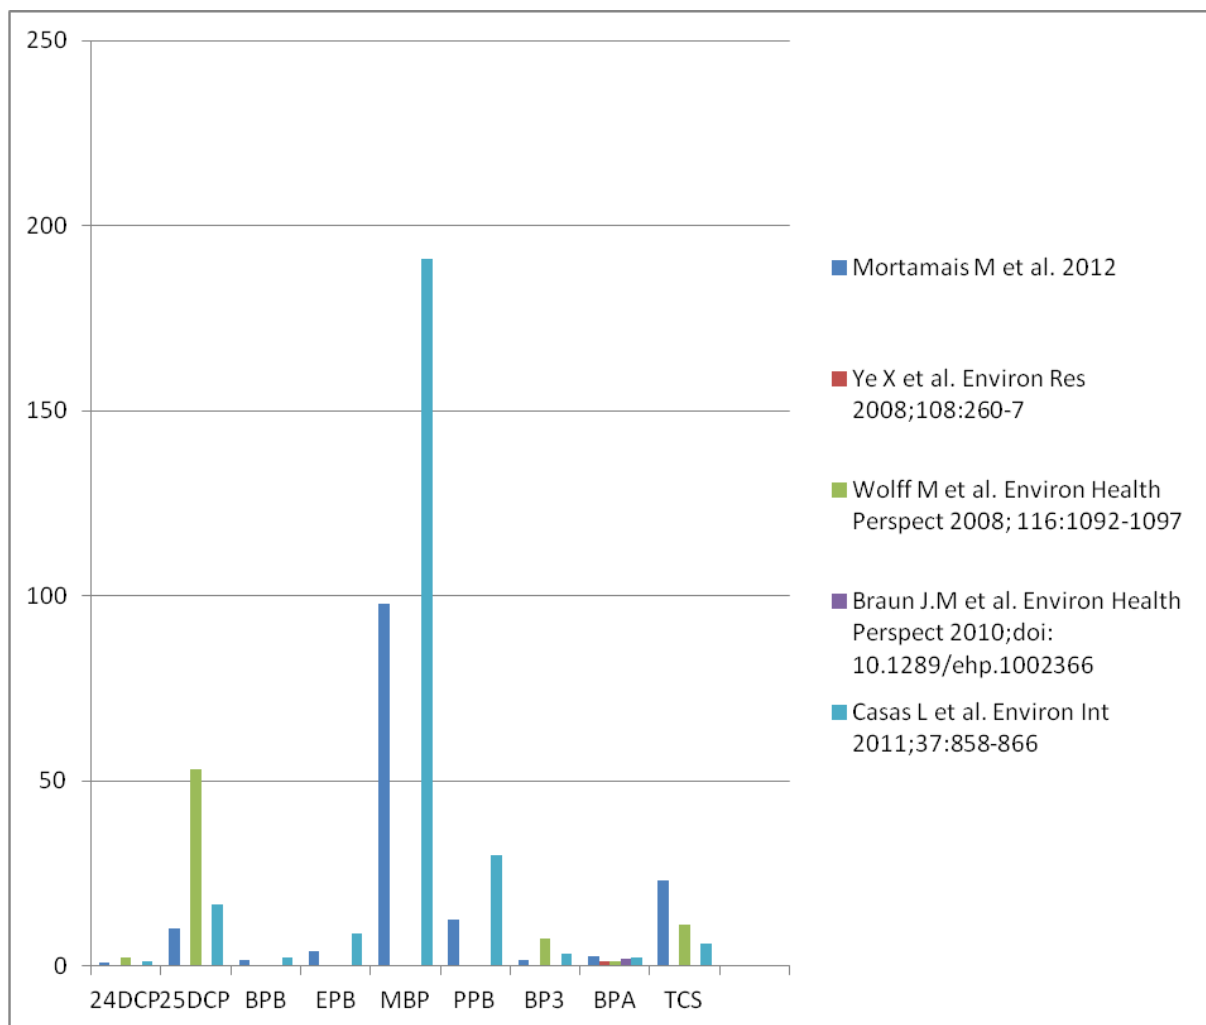

**Figure 2, Supplemental Material.** Median Values of Urinary Phenols ( $\mu\text{g/l}$ ) in Selected Publications Among Pregnant Women.
